# Supplementary material
Source: Springer Nature journal article supplement (https://www.springermedizin.de/resource/supplementary/12931_2012_1286_MOESM1_ESM.pdf/9425710)
Supplement: MOESM1 [file 9425710]

Additional file 1. Expression pattern of biological molecules in lung tissue obtained from patients with IPAH and related pathways. Continued on next page.

| [Pathway Name, ID*]                                                       | Regulation | Authors                    |
|---------------------------------------------------------------------------|------------|----------------------------|
| [ Signaling by BMP, REACT_12034]                                          |            |                            |
| BMP2: bone morphogenetic protein receptor, type II                        | Down       | Rajkumar R <sup>15</sup>   |
| [ Signaling by TGF beta, REACT_6844]                                      |            |                            |
| TGFBR2: transforming growth factor, beta receptor 2                       | Down       | Fantozzi I <sup>16</sup>   |
| TGFBR1: transforming growth factor, beta receptor 1                       | Down       | Fantozzi I <sup>16</sup>   |
| [Jak-STAT signaling, map04630]                                            |            |                            |
| CCL2: chemokine ligand 2                                                  | Up         | Sanchez O <sup>17</sup>    |
| IL15: interleukin 15                                                      | Up         | Masri FA <sup>18</sup>     |
| Stat3: signal transducer and activator of transcription 3                 | UP         | Masri FA <sup>18</sup>     |
| IL13RA2: interleukin 13 receptor, alpha 2                                 | Up         | Hecker M <sup>19</sup>     |
| MIR204: microRNA 204                                                      | Down       | Courboulin A <sup>20</sup> |
| [Hemostasis, REACT_604]                                                   |            |                            |
| PF4: platelet factor 4                                                    | Up         | Rajkumar R <sup>15</sup>   |
| F2RL3: coagulation factor II receptor-like 3                              | Up         | Rajkumar R <sup>15</sup>   |
| P2RY1: purinergic receptor P2Y                                            | Up         | Rajkumar R <sup>15</sup>   |
| ITPR1: inositol 1,4,5-trisphosphate receptor                              | Up         | Fantozzi I <sup>16</sup>   |
| TEK: endothelial-specific receptor tyrosine kinase                        | UP         | Dewachter L <sup>21</sup>  |
| TRPC6: transient receptor potential cation channel, subfamily C, member 6 | UP         | Yu Y <sup>22</sup>         |
| [Response to hypoxia, GO:0001666]                                         |            |                            |
| MMP2: matrix metalloproteinase 2                                          | UP         | Lepetit H <sup>23</sup>    |
| SLC6A4: solute carrier family 6, member 4                                 | UP         | Eddahibi S <sup>24</sup>   |
| [Signaling by PDGF, REACT_16888]                                          |            |                            |
| PDGFB: platelet-derived growth factor beta polypeptide                    | Up         | Perros F <sup>25</sup>     |
| PDGFRA: platelet-derived growth factor receptor, alpha polypeptide        | UP         | Perros F <sup>25</sup>     |
| PDGFRB: platelet-derived growth factor receptor, beta polypeptide         | Up         | Perros F <sup>25</sup>     |
| [Signaling by VEGF, REACT_12529]                                          |            |                            |
| VEGFA: vascular endothelial growth factor A                               | Up         | Rajkumar R <sup>15</sup>   |
| PKCA: PRKCA protein kinase C, alpha                                       | Up         | Do e Z <sup>26</sup>       |
| PKCD: PRKCA protein kinase C, delta                                       | Up         | Do e Z <sup>26</sup>       |

\* Accession number of Reactome, KEGG, and GO.

Additional file 1. Expression pattern of biological molecules in lung tissue obtained from patients with IPAH and related pathways. Continued from previous page.

| [Pathway Name, ID*]                                                 | Regulation | Authors                   |
|---------------------------------------------------------------------|------------|---------------------------|
| [Wnt/PCP pathway, map04310]                                         |            |                           |
| WNT11: wingless-related MMTV integration site 11                    | Up         | Laumanns IP <sup>27</sup> |
| AKT1: v-akt murine thymoma viral oncogene homolog 1                 | Up         | Laumanns IP <sup>27</sup> |
| DAAM1: dishevelled associated activator of morphogenesis 1          | Up         | Laumanns IP <sup>27</sup> |
| [ ROCK activation by Rho, REACT_19389]                              |            |                           |
| ROCK1: Rho-associated, coiled-coil containing protein kinase 1      | Up         | Do e Z <sup>26</sup>      |
| ROCK2: Rho-associated, coiled-coil containing protein kinase 2      | Up         | Do e Z <sup>26</sup>      |
| RHOA: ras homolog gene family, member A                             | Up         | Laumanns IP <sup>27</sup> |
| [Estrogen receptor signaling pathway, GO:0030520]                   |            |                           |
| ESR1: estrogen receptor 1                                           | Up         | Rajkumar R <sup>15</sup>  |
| [ Serotonin receptor signaling pathway, GO:0007210]                 |            |                           |
| HTR2B: 5-hydroxytryptamine receptor 2B                              | UP         | Fantozzi I <sup>16</sup>  |
| [Regulation of apoptotic process, GO:0042981]                       |            |                           |
| Tmod3: tropomodulin 3                                               | Up         | Rajkumar R <sup>15</sup>  |
| E2f1: E2F transcription factor-1                                    | Up         | Rajkumar R <sup>15</sup>  |
| Mybl1: A-myb myeloblastosis viral oncogene homolog 1                | Up         | Rajkumar R <sup>15</sup>  |
| Bcl2: B cell leukemia/lymphoma 2                                    | Up         | Masri FA <sup>18</sup>    |
| Mcl1: myeloid cell leukemia sequence 1                              | Up         | Masri FA <sup>18</sup>    |
| TIMP1: tissue inhibitor of metalloproteinase 1                      | Up         | Lepetit H <sup>23</sup>   |
| HOXA5: homeobox A5                                                  | Up         | Golpon HA <sup>28</sup>   |
| Ncoa2: nuclear receptor coactivator 2                               | Down       | Rajkumar R <sup>15</sup>  |
| Ppp2ca: protein phosphatase 2, catalytic subunit, $\alpha$ -isoform | Down       | Rajkumar R <sup>15</sup>  |
| PTGS2: prostaglandin-endoperoxide synthase 2                        | Down       | Rajkumar R <sup>15</sup>  |
| PPP1R15A: protein phosphatase 1, regulatory subunit 15A             | Down       | Fantozzi I <sup>16</sup>  |

\* Accession number of Reactome, KEGG, and GO.
